# Supplementary material for: Effects of Aloe vera Flower Extract and Its Active Constituent Isoorientin on Skin Moisturization via Regulating Involucrin Expression: In Vitro and Molecular Docking Studies
Source: MDPI journal article supplement (doi:10.3390/molecules26092626), 2021-04-30
Supplement: s1 [file s1]

**Figure S1:** Molecular docking study results showing pocket binding view(A) and different types of bond found during complex formation(B) of IV with IVL.

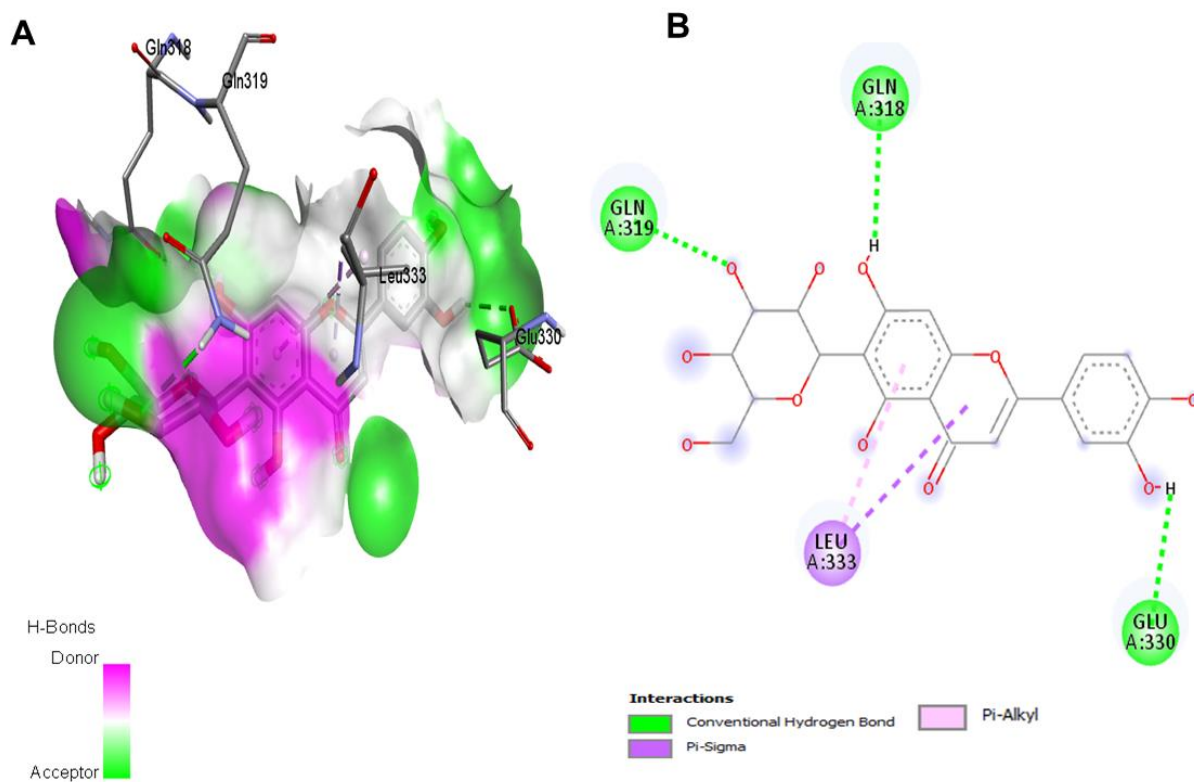

**Table S1.** Content analysis of major constituents of EE and AE (ng/mg) by HPLC.

| Sample Name             | IO           | V            | IV           |
|-------------------------|--------------|--------------|--------------|
| Retention time(Minutes) | 18.56        | 23.64        | 25.004       |
| Contents in EE          | 392.99±0.062 | 118.10±0.069 | 224.12±0.002 |
| Contents in AE          | 214.11±0.096 | 40.74±0.037  | 126.36±0.082 |
